# Supplementary material
Source: publisher site journal article supplement (https://www.spandidos-publications.com/37/downloadSupplementary)
Supplement: Supplementary file 1 [file downloadSupplementary]

Table SI. Clinicopathological characteristics of tumor cases from Beijing Xuanwu Hospital.

| Patient number | Patient ID | Sex    | Age, years | Pathological types      | TNM staging | Differentiation           | Distant metastasis |
|----------------|------------|--------|------------|-------------------------|-------------|---------------------------|--------------------|
| 1              | 595607     | Female | 77         | Adenocarcinoma          | T2N2M0      | Moderately differentiated | No                 |
| 2              | 608478     | Male   | 61         | Adenocarcinoma          | T2aN1M0     | Moderately differentiated | No                 |
| 3              | 589960     | Male   | 72         | Squamous cell carcinoma | T2NxM0      | Moderately differentiated | No                 |
| 4              | 563122     | Female | 97         | Adenocarcinoma          | T2N2M0      | Moderately differentiated | Bone               |
| 5              | 610216     | Male   | 78         | Adenocarcinoma          | T2N0M0      | Moderately differentiated | No                 |
| 6              | 592411     | Male   | 59         | Squamous cell carcinoma | T2N0M0      | Poorly differentiated     | No                 |
| 7              | 613700     | Male   | 66         | Adenocarcinoma          | T2bN0M0     | Moderately differentiated | No                 |
| 8              | 592079     | Male   | 50         | Adenocarcinoma          | T2aN0M0     | Moderately differentiated | No                 |
| 9              | 588936     | Male   | 56         | Adenocarcinoma          | T2N0M0      | Moderately differentiated | No                 |
| 10             | 616425     | Female | 78         | Adenocarcinoma          | T2N0M0      | Poorly differentiated     | No                 |
| 11             | 530464     | Male   | 52         | Squamous cell carcinoma | T3N0M0      | Poorly differentiated     | No                 |
| 12             | 572643     | Male   | 60         | Squamous cell carcinoma | T4N1M0      | Poorly differentiated     | No                 |
| 13             | 572274     | Male   | 67         | Adenocarcinoma          | T1bN0M0     | Poorly differentiated     | No                 |

|    |        |        |    |                |        |                              |    |
|----|--------|--------|----|----------------|--------|------------------------------|----|
| 14 | 571244 | Female | 53 | Adenocarcinoma | T4N2M0 | Poorly<br>differentiated     | No |
| 15 | 625561 | Female | 62 | Adenocarcinoma | T2N1M0 | Moderately<br>differentiated | No |
